# Supplementary material for: Identification and Quantification of Selected Benzoxazinoids and Phenolics in Germinated Spelt (Triticum spelta)
Source: MDPI journal article supplement (doi:10.3390/foods12091769), 2023-04-24
Supplement: s1 [file s1]

**Supplementary Table S1.** Characteristics of the phenolic compounds in germinated spelt extracts as analysed by LC-MS

|                               | Rt (min) | ESI-<br>Precursor<br>ion | Fragment<br>ion | Standard<br>LOQ<br>ng/column | LOD<br>ng/column | Sample<br>LOQ<br>ng/column | LOD<br>ng/column | Recovery<br>(%) |
|-------------------------------|----------|--------------------------|-----------------|------------------------------|------------------|----------------------------|------------------|-----------------|
| Schaftoside                   | 10.82    | 563.16                   | 353.06          | 0.27                         | 0.08             | 0.48                       | 0.17             | 95.66           |
| Isoschaftoside                | 11.26    | 563.16                   | 353.06          | 0.22                         | 0.07             | 0.44                       | 0.14             | 93.35           |
| BOA                           | 9.18     | 133.93                   | 90.93           | 0.09                         | 0.03             | 0.21                       | 0.07             | 94.28           |
| MBOA                          | 11.75    | 163.95                   | 148.92          | 0.17                         | 0.05             | 0.39                       | 0.14             | 95.34           |
| <i>trans</i> -ferulic acid    | 11.08    | 192.95                   | 133.94          | 0.11                         | 0.04             | 0.19                       | 0.06             | 96.78           |
| <i>trans</i> -p-Coumaric acid | 9.63     | 162.90                   | 119.47          | 0,53                         | 0,16             | 0,78                       | 0,27             | 93,77           |

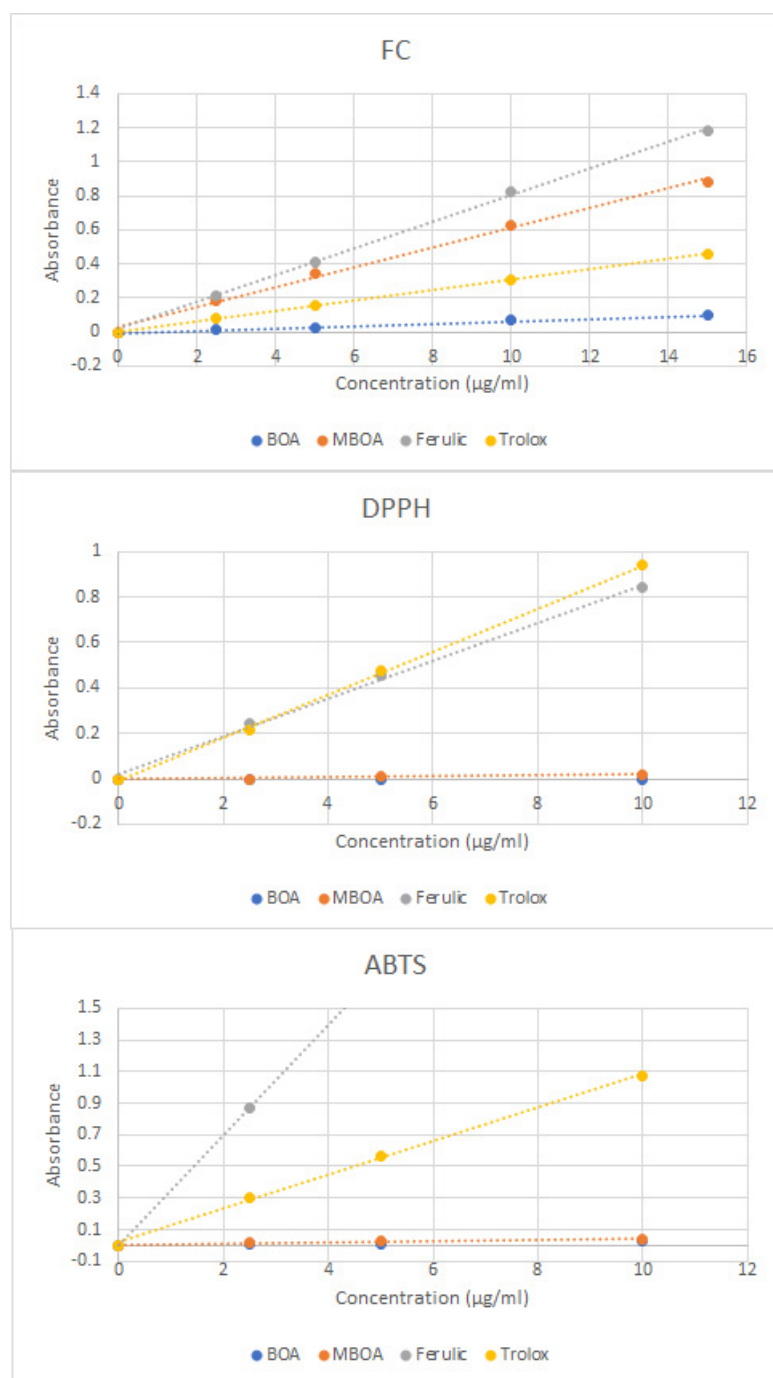

**Supplementary Figure S1.** Specific reactivities of selected compounds toward FC, DPPH and ABTS reagents

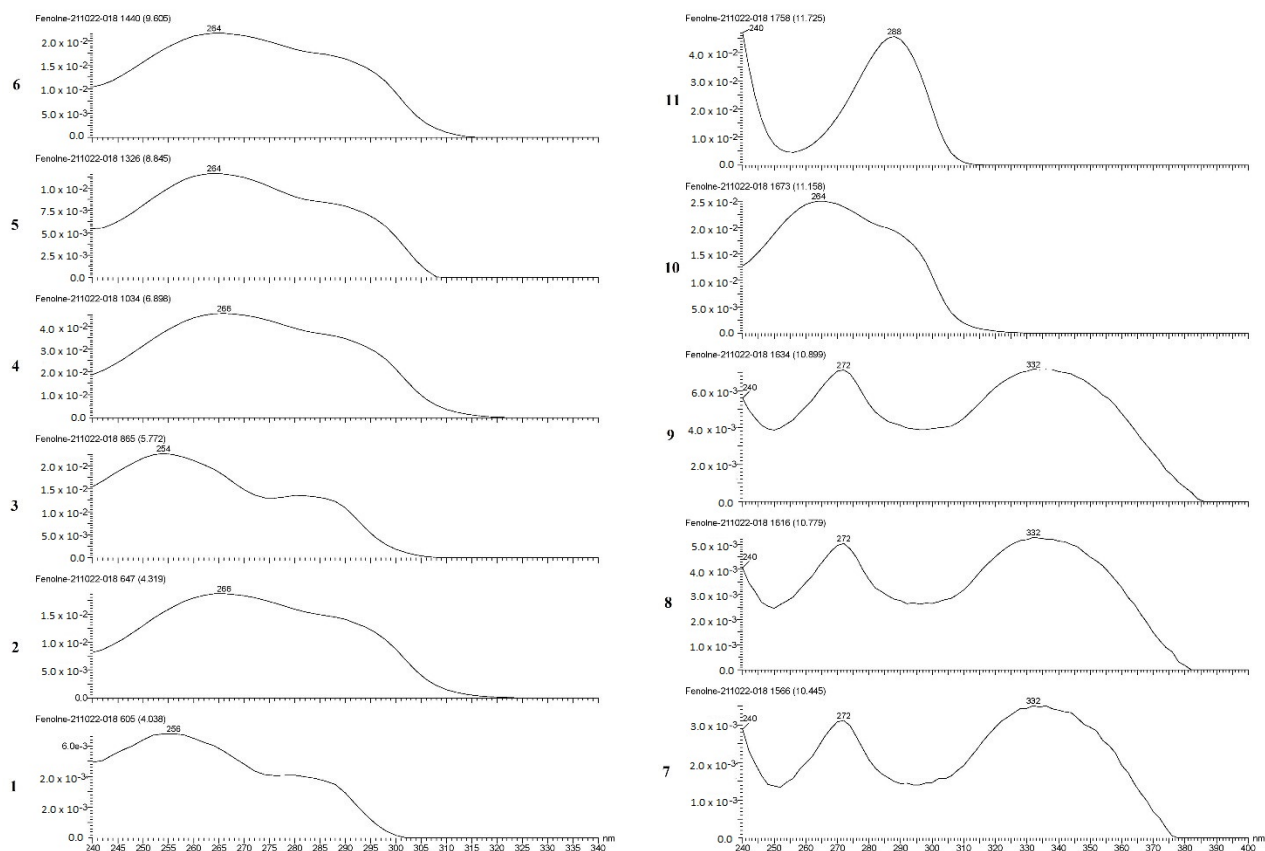

**Supplementary Figure S2.** UV spectrum of selected compounds in germinated spelt extracts. **1-** Unidentified, ( $m/z$  534.3); **2-** Unidentified, ( $m/z$  534.3); **3-** Unidentified, ( $m/z$  134.2); **4-** Unidentified, ( $m/z$  418.2); **5-** HBOA; **6-** Unidentified, ( $m/z$  594.5); **7-** Shaftoside structural isomer 1; **8-** Shaftoside; **9-** Shaftoside structural isomer 2; **10-** Unidentified ( $m/z$  432.4); **11-** MBOA.

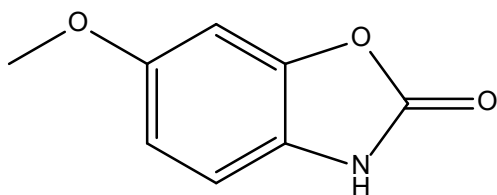

**Supplementary Figure S3.** Structure of 6-Methoxy-2-benzoxazolinone (MBOA)

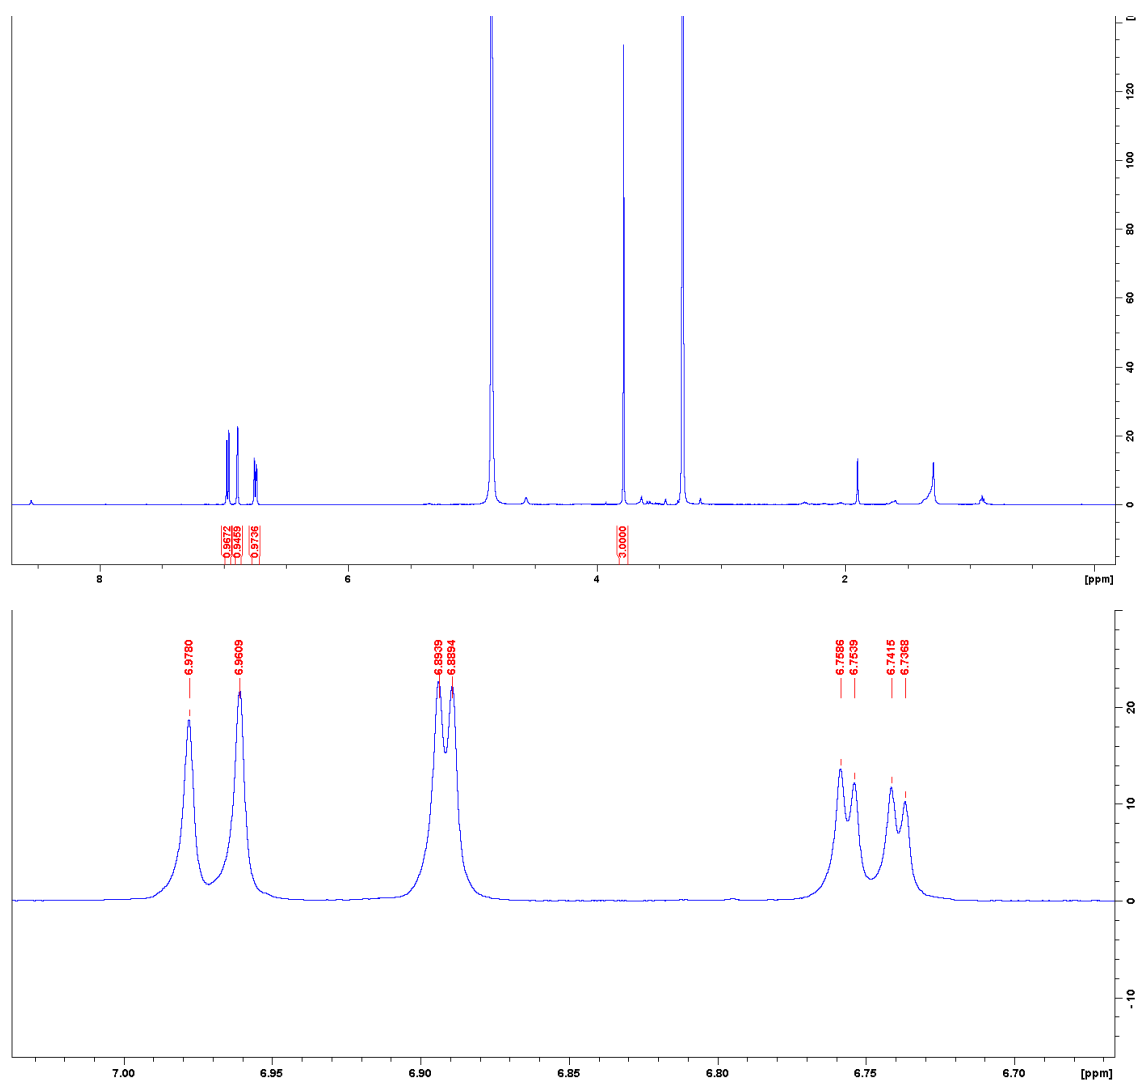

Supplementary Figure S4.  $^1\text{H}$  NMR spectrum of MBOA

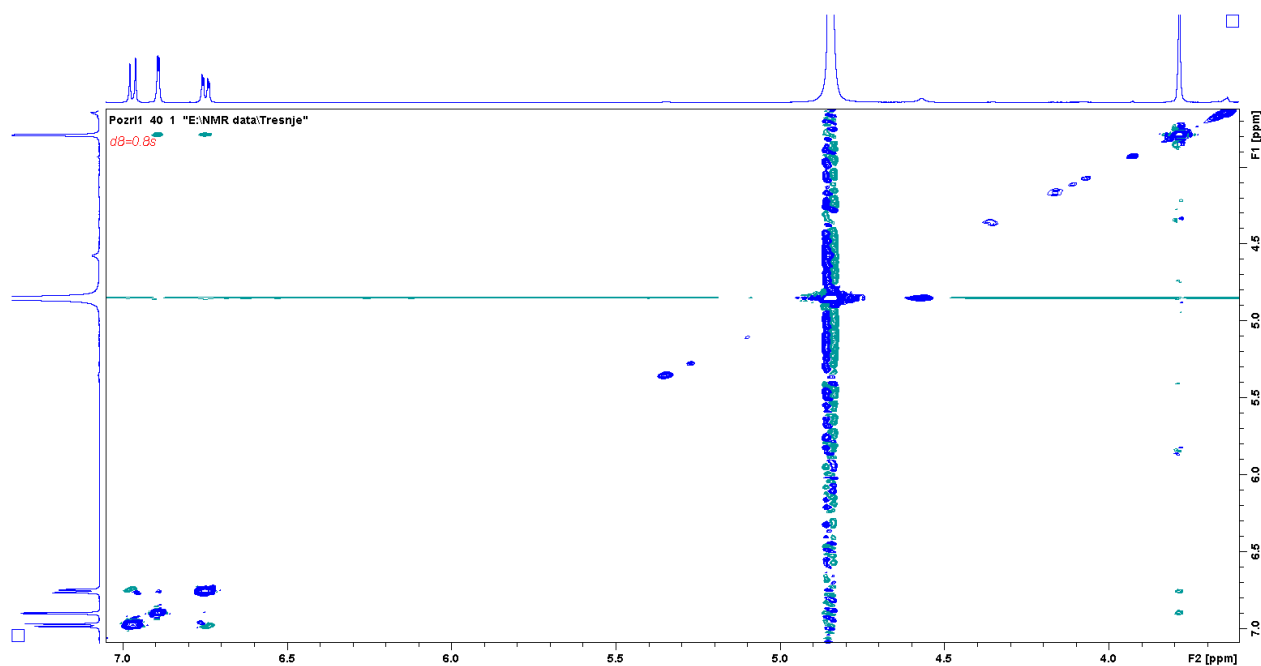

Supplementary Figure S5. NOESY spectrum of MBOA

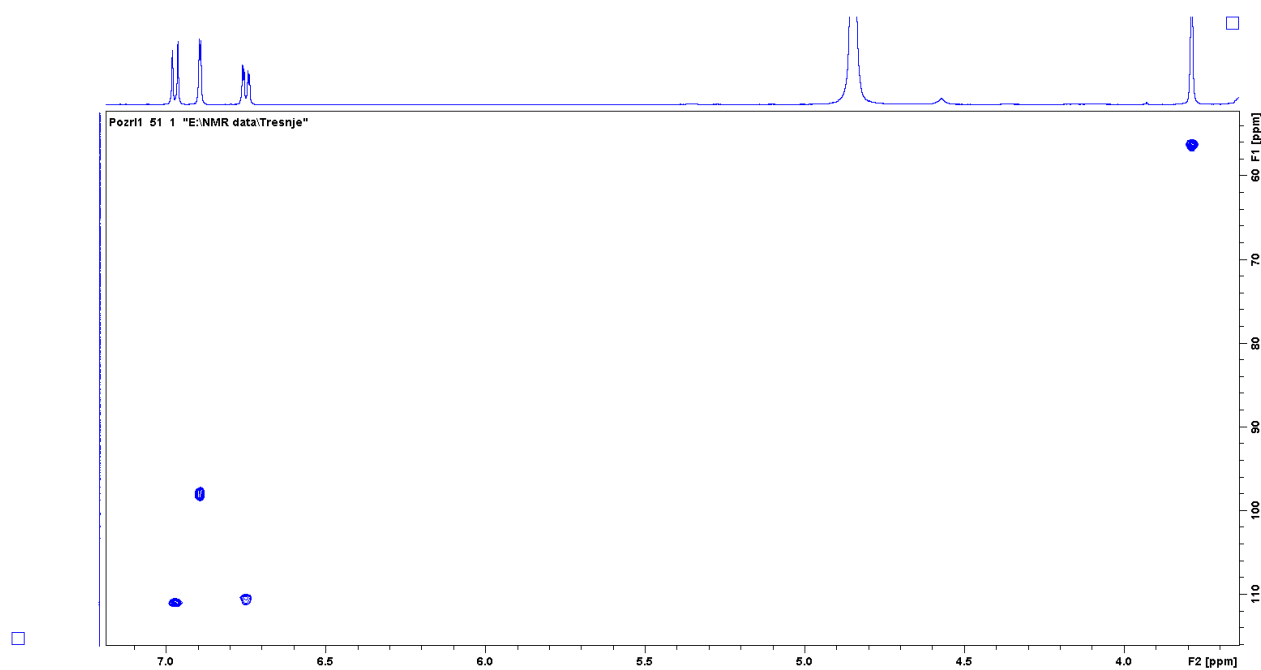

Supplementary Figure S6. HSQC spectrum of MBOA
